# Supplementary material for: Participant characteristics in the prevention of gestational diabetes as evidence for precision medicine: a systematic review and meta-analysis
Source: PubMed Central journal article supplement (PMC10551015; doi:10.1038/s43856-023-00366-x), 2023-10-05
Supplement: 43856_2023_366_MOESM8_ESM.pdf [file 43856_2023_366_MOESM8_ESM.pdf]

Supplementary Table 1. Search strategies

| Search Queries                                                                                                                                                                                                                                                                                                                                                                                                                                                                                                                                                                                                                                                                                                                                                                                                                                                                                                                                                                                                                                                                                                                                                                                                                                                                                                                                                                                                                                                                                                                                                                                                                                                                                                                                                                                                                                                                                                                                                                                                                                                                                                                                                                                             |
|------------------------------------------------------------------------------------------------------------------------------------------------------------------------------------------------------------------------------------------------------------------------------------------------------------------------------------------------------------------------------------------------------------------------------------------------------------------------------------------------------------------------------------------------------------------------------------------------------------------------------------------------------------------------------------------------------------------------------------------------------------------------------------------------------------------------------------------------------------------------------------------------------------------------------------------------------------------------------------------------------------------------------------------------------------------------------------------------------------------------------------------------------------------------------------------------------------------------------------------------------------------------------------------------------------------------------------------------------------------------------------------------------------------------------------------------------------------------------------------------------------------------------------------------------------------------------------------------------------------------------------------------------------------------------------------------------------------------------------------------------------------------------------------------------------------------------------------------------------------------------------------------------------------------------------------------------------------------------------------------------------------------------------------------------------------------------------------------------------------------------------------------------------------------------------------------------------|
| <p><b>Medline (Ovid)</b></p> <ol style="list-style-type: none"> <li>1. Pregnancy/ or Gravidity/ or Preconception Care/</li> <li>2. (antenatal or ante* adj2 natal) or childbearing or (child adj2 bearing) or gestation* or family planning services or gravid* or interconcept* or intergestation* or internatal or matern* or periconcept* or preconcept* or pregestation* or prenatal* or prepregn* or ((inter or pre or peri) adj2 (concept* or gestation* or natal or pregnan*))).ti,ab,kw.</li> <li>3. 1 or 2</li> <li>4. Behavior Therapy/ or Cognitive Behavioral Therapy/ or Diet/ or Exercise/ or Health Behavior/ or Health Education/ or Health Promotion/ or Life Style/ or Weight Loss/</li> <li>5. ((behav* adj2 (cognit* or manag* or modif* or therap*)) or CBT or diet* or (health* adj2 (behav* or eat* or educat* or food* or promotion)) or lifestyle or (life adj2 style) or nutrition or physical activit* or (weight adj2 (loss or manag* or reduction or retention))).ti,ab,kw.</li> <li>6. 4 or 5</li> <li>7. Biguanides/ or Metformin/ or Buformin/ or Chlorhexidine/ or Proguanil/ or Phenformin/</li> <li>8. (biguanid* or metformin* or buformin* or chlorhexidin* or chlorguanid* or phenformin*).ti,ab,kw.</li> <li>9. 7 or 8</li> <li>10. 6 or 9</li> <li>11. Blood Glucose/ or Diabetes, Gestational/ or Glucose Tolerance Test/ or Insulin/ or Insulin Resistance/ or Obesity/ or Overweight/</li> <li>12. (gestational weight gain or glucose* or glycemic* or insulin resistan*).ti,ab,kw.</li> <li>13. ((obes* or overweight or weight gain) adj3 (women or matern* or pregnan*)).ti,ab,kw.</li> <li>14. 11 or 12 or 13</li> <li>15. "Clinical Trials as Topic"/ or Controlled Clinical Trial/ or Randomized Controlled Trial/</li> <li>16. (trial or randomiz* or RCT or randomis* or control group* or two arm* or (two adj2 arm) or quasiexperiment* or (quasi* adj2 experiment*) or (matched adj2 (cohort* or control*))).ti,ab.</li> <li>17. randomi*.pt.</li> <li>18. (intervention or assigned* or compar*).ti,ab.</li> <li>19. 15 or 16 or 17 or 18</li> <li>20. 3 and 10 and 14 and 19</li> <li>21. 20 not (Animals/ not (Animals/ and Humans/))</li> </ol> |
| <p><b>Embase</b></p>                                                                                                                                                                                                                                                                                                                                                                                                                                                                                                                                                                                                                                                                                                                                                                                                                                                                                                                                                                                                                                                                                                                                                                                                                                                                                                                                                                                                                                                                                                                                                                                                                                                                                                                                                                                                                                                                                                                                                                                                                                                                                                                                                                                       |

#1. antenatal:ti,ab OR ((ante\* NEAR/2 natal):ti,ab) OR childbearing:ti,ab OR ((child NEAR/2 bearing):ti,ab) OR gestation\*:ti,ab OR 'family planning services':ti,ab OR gravid\*:ti,ab OR interconcept\*:ti,ab OR intergestation\*:ti,ab OR internatal:ti,ab OR matern\*:ti,ab OR periconcept\*:ti,ab OR preconcept\*:ti,ab OR pregestation\*:ti,ab OR prenatal\*:ti,ab OR prepregn\*:ti,ab OR (((inter\* OR pre\* OR peri\*)

NEAR/2 (concept\* OR gestation\* OR natal OR pregnan\*)):ti,ab)

#2. 'pregnancy'/exp OR 'prepregnancy care'/exp

#3. #1 OR #2

#4. 'behavior therapy'/exp OR 'cognitive behavioral therapy'/exp OR 'diet'/exp OR 'exercise'/exp OR 'health behavior'/exp OR 'health education'/exp OR 'health promotion'/exp OR 'lifestyle'/exp OR 'body weight loss'/exp

#5. (((behav\* NEAR/2 (cognit\* OR manag\* OR modif\* OR therap\*)):ti,ab) OR cbt:ti,ab OR diet\*:ti,ab OR ((health\* NEAR/2 (behav\* OR eat\* OR educat\* OR food\* OR promotion)):ti,ab) OR lifestyle:ti,ab OR ((life NEAR/2 style):ti,ab) OR nutrition:ti,ab OR physical:ti,ab) AND activit\*:ti,ab OR ((weight NEAR/2 (loss OR manag\* OR reduction OR retention)):ti,ab)

#6. #4 OR #5

#7. 'biguanide'/exp OR 'metformin'/exp OR 'buformin'/exp OR 'chlorhexidine'/exp OR 'proguanil'/exp OR 'phenformin'/exp

#8. biguanid\*:ti,ab OR metformin\*:ti,ab OR buformin\*:ti,ab OR chlorhexidin\*:ti,ab OR chlorguanid\*:ti,ab OR phenformin\*:ti,ab

#9. #7 OR #8

#10. #6 OR #9

#11. 'glucose blood level'/exp OR 'pregnancy diabetes mellitus'/exp OR 'glucose tolerance test'/exp OR 'insulin'/exp OR 'insulin resistance'/exp OR 'obesity'/exp

#12. 'gestational weight gain':ti,ab OR glucose\*:ti,ab OR glycemc\*:ti,ab OR glycaemic\*:ti,ab OR ((insulin\* NEAR/2 resist\*):ti,ab)

#13. ((obes\* OR overweight OR 'weight gain') NEAR/3 (women OR matern\* OR pregnan\*)):ti,ab

#14. #11 OR #12 OR #13

#15. 'crossover procedure':de OR 'double-blind

procedure':de OR 'randomized controlled trial':de OR 'single-blind procedure':de OR

random\*:de,ab,ti OR factorial\*:de,ab,ti OR crossover\*:de,ab,ti OR ((cross NEXT/1 over\*):de,ab,ti) OR placebo\*:de,ab,ti OR ((doubl\* NEAR/1 blind\*):de,ab,ti) OR ((singl\* NEAR/1 blind\*):de,ab,ti) OR assign\*:de,ab,ti OR allocat\*:de,ab,ti OR volunteer\*:de,ab,ti

#16. #3 AND #10 AND #14 AND #15 AND [humans]/lim

## Pubmed

#1

("Pregnancy"[Mesh] OR "Gravidity"[Mesh] OR "Preconception Care"[Mesh]) OR (gravid\*[Title/Abstract] OR pregnan\*[Title/Abstract] OR childbearing[Title/Abstract] OR child bearing[Title/Abstract] OR gestation\*[Title/Abstract] OR matern\*[Title/Abstract] OR preconcept\*[Title/Abstract] OR prenatal[Title/Abstract] OR antenatal[Title/Abstract] OR pre-concept\*[Title/Abstract] OR "pre concept\*"[Title/Abstract] OR prepregnan\*[Title/Abstract] OR pre-pregnan\*[Title/Abstract] OR "pre-pregnan\*"[Title/Abstract] OR pregestation\*[Title/Abstract] OR pre-gestation\*[Title/Abstract] OR "pre gestation\*"[Title/Abstract] OR periconcept\*[Title/Abstract] OR peri-concept\*[Title/Abstract] OR "peri concept\*"[Title/Abstract] OR interconcept\*[Title/Abstract] OR inter-concept\*[Title/Abstract] OR "inter concept\*"[Title/Abstract] OR interpregnan\*[Title/Abstract] OR inter-pregnan\*[Title/Abstract] OR "inter pregnan\*"[Title/Abstract] OR intergestation\*[Title/Abstract] OR inter-gestation\*[Title/Abstract] OR "inter gestation\*"[Title/Abstract] OR internatal[Title/Abstract] OR "family planning services"[Title/Abstract] OR "family-planning services"[Title/Abstract] OR ante-natal[Title/Abstract] OR pre-natal[Title/Abstract])

#2

(behavior therap\*[Title/Abstract] OR behaviour therap\*[Title/Abstract] OR behavioral therap\*[Title/Abstract] OR behavioural therap\*[Title/Abstract] OR behavior modif\*[Title/Abstract] OR behaviour modif\*[Title/Abstract] OR behavioral modif\*[Title/Abstract] OR behavioural modif\*[Title/Abstract] OR behavior manage\*[Title/Abstract] OR behaviour manage\*[Title/Abstract] OR behavioral manage\*[Title/Abstract] OR behavioural manage\*[Title/Abstract] OR cbt[Title/Abstract] OR diet\*[Title/Abstract] OR health behavior\*[Title/Abstract] OR health education[Title/Abstract] OR health promotion[Title/Abstract] OR healthy eat\*[Title/Abstract] OR healthy food[Title/Abstract] OR life style[Title/Abstract] OR lifestyle[Title/Abstract] OR life-style[Title/Abstract] OR nutrition[Title/Abstract] OR physical activit\*[Title/Abstract] OR weight loss[Title/Abstract] OR weight management[Title/Abstract] OR weight reduction[Title/Abstract] OR weight retention[Title/Abstract]) OR ("Behavior Therapy"[Mesh] OR "Cognitive Behavioral Therapy"[Mesh] OR "Diet"[Mesh] OR "Exercise"[mesh] OR "Health Behavior"[mesh] OR "Health Education"[Mesh] OR "Health Promotion"[Mesh] OR "Life Style"[Mesh] OR "Weight Loss"[Mesh])

#3

("Biguanides"[Mesh] OR "Metformin"[Mesh] OR "Buformin"[Mesh] OR "Chlorhexidine"[Mesh] OR "Proguanil"[Mesh] OR "Phenformin"[Mesh]) OR (biguanid\*[Title/Abstract] OR metformin\*[Title/Abstract] OR

buformin\*[Title/Abstract] OR chlorhexidin\*[Title/Abstract] OR chlorguanid\*[Title/Abstract] OR phenformin\*[Title/Abstract])

#4

#2 OR #3

#5

("Blood Glucose"[mesh] OR "Diabetes, Gestational"[Mesh] OR "Insulin"[mesh] OR "Insulin Resistance" OR "Glucose Tolerance Test"[mesh] OR "Obesity"[mesh] OR "Overweight"[mesh]) OR ("gestational weight gain"[Title/Abstract] OR "glucose intolerance" [Title/Abstract] OR glucose\*[Title/Abstract] OR glyceemic\*[Title/Abstract] OR "insulin resistanc\*" [Title/Abstract] OR obesity[Title/Abstract])

#6

"Clinical Trials as Topic"[Mesh] OR "Randomized Controlled Trial"[Publication Type] OR trial[Title/Abstract] OR randomiz\*[Title/Abstract] OR RCT[Title/Abstract] OR randomis\*[Title/Abstract] OR "control group\*" [Title/Abstract] OR "two-arm\*" [Title/Abstract] OR "two arm" [Title/Abstract] OR "quasi-experiment\*" [Title/Abstract] OR "matched cohort\*" [Title/Abstract] OR "matched control\*" [Title/Abstract] OR intervention[Title/Abstract] OR assigned\*[Title/Abstract] OR compar\*[Title/Abstract]

#7

#1 AND #4 AND #5 AND #6

Supplementary Table 2: Inclusion criteria

| Population                      | Intervention                                                                                                                                                                                                                                                                                                                                                                                                                                           | Outcome                                                                                            | Limits                                                                                                                |
|---------------------------------|--------------------------------------------------------------------------------------------------------------------------------------------------------------------------------------------------------------------------------------------------------------------------------------------------------------------------------------------------------------------------------------------------------------------------------------------------------|----------------------------------------------------------------------------------------------------|-----------------------------------------------------------------------------------------------------------------------|
| All women (of childbearing age) | <p><u>Interventions:</u></p> <ul style="list-style-type: none"> <li>● Diet</li> <li>● Physical activity</li> <li>● Behavioral</li> <li>● Lifestyle</li> <li>● Combined (diet, behavioral, physical activity)</li> <li>● Metformin</li> <li>● Supplementation</li> </ul> <p><u>Control:</u></p> <ul style="list-style-type: none"> <li>● Usual care</li> <li>● Placebo</li> <li>● Minimal intervention (e.g. not more than 1 session a year)</li> </ul> | <p><u>Primary</u><br/>Gestational diabetes</p> <p><u>Secondary</u><br/>Gestational weight gain</p> | <p>Randomized or non-randomized controlled trials</p> <p>Language: English</p> <p>Years of publication: all years</p> |

Supplementary Table 3: Definition of participant characteristics

| Category                                   | Definition                                                                                                                                                                                                                                                                                                           |
|--------------------------------------------|----------------------------------------------------------------------------------------------------------------------------------------------------------------------------------------------------------------------------------------------------------------------------------------------------------------------|
| Gestational age                            | <ul style="list-style-type: none"> <li>● Preconception</li> <li>● 1<sup>st</sup> trimester: ≤12 gestational week</li> <li>● Early 2<sup>nd</sup> trimester: 13-17 weeks</li> <li>● Late 2<sup>nd</sup> trimester: ≥18-26 weeks</li> </ul> <p>(if it was a range, the highest number of the range was considered)</p> |
| Educational status                         | <ul style="list-style-type: none"> <li>● Tertiary education: if ≥50% of the participants had attended tertiary education.</li> <li>● Not attended tertiary education: if &lt;50% of the participants had attended tertiary education.</li> </ul>                                                                     |
| Employment                                 | <ul style="list-style-type: none"> <li>● Employed: if ≥50% of the participants were employed.</li> <li>● Unemployed: if &lt;50% of the participants were employed.</li> </ul>                                                                                                                                        |
| Ethnicity                                  | <ul style="list-style-type: none"> <li>● White: ≥80% of the participants were of European and other Caucasian origins.</li> <li>● Non-white: if &lt;80 were white.</li> <li>● Mixed: a combination of White and non-White where neither was &gt;80% for each group</li> </ul>                                        |
| BMI (based on inclusion criteria)          | <ul style="list-style-type: none"> <li>● Normal weight: if only participants in normal-weight BMI category were recruited.</li> <li>● Overweight, obesity: if only participants in overweight/obesity BMI categories were recruited.</li> </ul>                                                                      |
| Parity                                     | <ul style="list-style-type: none"> <li>● Nulliparous: if all participants were nulliparous</li> <li>● Not nulliparous: If none of the participants were nulliparous</li> <li>● Mixed: A mixture of nulliparous and not nulliparous</li> </ul>                                                                        |
| Hypertension (based on inclusion criteria) | <ul style="list-style-type: none"> <li>● With: if all participants had hypertension.</li> <li>● Without: if all participants were free of hypertension.</li> </ul>                                                                                                                                                   |
| Prediabetes (based on inclusion criteria)  | <ul style="list-style-type: none"> <li>● With: if all participants had prediabetes.</li> <li>● Without: if all participants were free of prediabetes.</li> </ul>                                                                                                                                                     |

|                                                                                        |                                                                                                                                                                                      |
|----------------------------------------------------------------------------------------|--------------------------------------------------------------------------------------------------------------------------------------------------------------------------------------|
| Polycystic ovary syndrome (PCOS) (based on inclusion criteria)                         | <ul style="list-style-type: none"> <li>● With: if all participants had PCOS.</li> <li>● Without: if all participants were free of PCOS.</li> </ul>                                   |
| Cardiovascular disease (CVD) (based on inclusion criteria)                             | <ul style="list-style-type: none"> <li>● With: if all participants had CVD</li> <li>● Without: if all participants were free of CVD</li> </ul>                                       |
| Smoking (based on inclusion criteria)                                                  | <ul style="list-style-type: none"> <li>● With: if all participants had a history of smoking</li> <li>● Without: if all participants were free of history of smoking</li> </ul>       |
| History of macrosomia (based on inclusion criteria)                                    | <ul style="list-style-type: none"> <li>● With: if all participants had a history of macrosomia</li> <li>● Without: if all participants were free of history of macrosomia</li> </ul> |
| History of gestational diabetes (GDM)(based on inclusion criteria)                     | <ul style="list-style-type: none"> <li>● With: if all participants had a history of GDM</li> <li>● Without: if all participants were free of history of GDM</li> </ul>               |
| History of hypertensive disorders during pregnancy (HDP) (based on inclusion criteria) | <ul style="list-style-type: none"> <li>● With: if all participants had a history of HDP</li> <li>● Without: if all participants were free of history of HDP</li> </ul>               |
| History of stillbirth (based on inclusion criteria)                                    | <ul style="list-style-type: none"> <li>● With: if all participants had a history of stillbirth</li> <li>● Without: if all participants were free of history of stillbirth</li> </ul> |

Supplementary Table 4: Categorisation of participant characteristics for subgroup analysis

| Author, year            | Trimester     | BMI              | Tertiary educated | Employment | Ethnicity | Hypertension | Hyperlipidemia | Prediabetes | Parity      | PCOS | Stillbirth | Family history of diabetes | Prior macrosomia | Past history of GDM | Past history of HBP | History of CVD | Smoking |
|-------------------------|---------------|------------------|-------------------|------------|-----------|--------------|----------------|-------------|-------------|------|------------|----------------------------|------------------|---------------------|---------------------|----------------|---------|
| Abdel-Aziz, 2018        | 1st           | All BMIs         | No                | No         | NR        | NR           | NR             | NR          | Nulliparous | NR   | No         | NR                         | NR               | NR                  | NR                  | NR             | NR      |
| Adb El Hameed, 2011     | Preconception | All BMIs         | NR                | NR         | NR        | NR           | NR             | NR          | NR          | Yes  | NR         | NR                         | NR               | NR                  | NR                  | NR             | NR      |
| Ainuddin, 2015          | Preconception | All BMIs         | NR                | NR         | NR        | NR           | NR             | NR          | Mixed       | Yes  | NR         | NR                         | NR               | NR                  | NR                  | NR             | NR      |
| Alamolhoda, 2019        | 1st           | All BMIs         | No                | No         | NR        | No           | NR             | No          | NR          | NR   | No         | No                         | No               | No                  | No                  | No             | No      |
| Al Wattar, 2018         | Early 2nd     | All BMIs         | NR                | NR         | Mixed     | NR           | NR             | No          | Mixed       | NR   | NR         | NR                         | NR               | No                  | NR                  | NR             | NR      |
| Assaf-Balut, 2017       | 1st           | All BMIs         | Yes               | NR         | Mixed     | NR           | NR             | NR          | Mixed       | NR   | NR         | NR                         | NR               | NR                  | NR                  | NR             | NR      |
| Barakat, 2013           | 1st           | All BMIs         | No                | Yes        | NR        | No           | NR             | No          | NR          | NR   | NR         | NR                         | NR               | NR                  | NR                  | NR             | NR      |
| Barakat, 2012           | 1st           | All BMIs         | No                | Yes        | NR        | NR           | NR             | NR          | Mixed       | NR   | NR         | NR                         | NR               | NR                  | NR                  | NR             | NR      |
| Barakat, 2019           | 1st           | All BMIs         | No                | NR         | NR        | NR           | NR             | No          | Mixed       | NR   | NR         | NR                         | NR               | No                  | NR                  | NR             | NR      |
| Barakat, 2014           | 1st           | All BMIs         | No                | NR         | NR        | NR           | NR             | NR          | Mixed       | NR   | NR         | NR                         | NR               | NR                  | No                  | No             | NR      |
| Basu, 2021              | Late 2nd      | Obese            | NR                | NR         | Non-White | No           | NR             | NR          | Mixed       | NR   | NR         | NR                         | NR               | NR                  | NR                  | NR             | NR      |
| Bogaerts, 2013          | Early 2nd     | Obese            | No                | Yes        | Mixed     | NR           | NR             | No          | Mixed       | NR   | NR         | NR                         | NR               | NR                  | NR                  | NR             | NR      |
| Bruno, 2016             | 1st           | Overweight/obese | No                | Yes        | White     | No           | NR             | NR          | Mixed       | NR   | NR         | NR                         | NR               | No                  | NR                  | NR             | No      |
| Buckingham-Schutt, 2019 | Early 2nd     | All BMIs         | NR                | NR         | NR        | No           | NR             | NR          | NR          | NR   | NR         | NR                         | NR               | No                  | No                  | No             | NR      |
| Cahill, 2018            | Early 2nd     | Overweight/obese | No                | NR         | NR        | NR           | NR             | No          | Mixed       | NR   | NR         | NR                         | No               | No                  | NR                  | NR             | No      |













|                                          |           |                  |     |     |       |    |    |    |                 |     |    |    |     |    |    |    |    |
|------------------------------------------|-----------|------------------|-----|-----|-------|----|----|----|-----------------|-----|----|----|-----|----|----|----|----|
| Trak-Fellermeier 2019, Haslam 2020, 2019 | Early 2nd | Overweight/obese | Yes | NR  | Mixed | NR | NR | No | Mixed           | NR  | NR | NR | NR  | NR | NR | NR | No |
| Valdés, 2018                             | Early 2nd | All BMIs         | NR  | NR  | NR    | NR | NR | No | Mixed           | NR  | NR | NR | NR  | NR | NR | NR | NR |
| Horn, 2018                               | Early 2nd | Overweight/obese | Yes | NR  | Mixed | NR | NR | No | Mixed           | NR  | NR | NR | NR  | NR | NR | NR | No |
| Vanky, 2010                              | Early 2nd | All BMIs         | NR  | NR  | NR    | NR | NR | NR | Mixed           | Yes | NR | NR | NR  | NR | NR | NR | NR |
| Vesco, 2014                              | Late 2nd  | Obese            | Yes | NR  | White | NR | NR | No | NR              | NR  | NR | NR | NR  | NR | NR | NR | NR |
| Vinter 2011<br>Vinter 2014,<br>2014      | Early 2nd | Obese            | Yes | Yes | NR    | No | NR | No | Mixed           | NR  | NR | NR | NR  | No | NR | No | NR |
| Vitale, 2021                             | Early 2nd | Overweight       | NR  | NR  | NR    | NR | NR | No | Mixed           | NR  | NR | NR | NR  | No | NR | NR | NR |
| Walsh, 2012                              | Late 2nd  | Normal weight    | NR  | NR  | NR    | NR | NR | NR | Not nulliparous | NR  | NR | NR | Yes | No | NR | NR | NR |
| Wang, 2015                               | 1st       | All BMIs         | NR  | NR  | NR    | NR | NR | NR | NR              | NR  | NR | NR | NR  | NR | NR | NR | NR |
| Wang, 2017                               | Early 2nd | Overweight       | Yes | NR  | NR    | No | NR | No | Mixed           | NR  | NR | NR | NR  | NR | NR | No | No |
| Wickens, 2017                            | Early 2nd | All BMIs         | NR  | NR  | Mixed | NR | NR | NR | Mixed           | NR  | NR | NR | NR  | NR | NR | NR | NR |
| Wolff, 2008                              | Early 2nd | Obese            | NR  | NR  | White | NR | NR | NR | NR              | NR  | NR | NR | NR  | NR | NR | NR | No |
| Xu, 2022                                 | Late 2nd  | All BMIs         | NR  | NR  | NR    | NR | NR | NR | Mixed           | NR  | NR | NR | NR  | NR | NR | NR | NR |
| Zhang, 2015                              | 1st       | All BMIs         | NR  | NR  | NR    | NR | NR | NR | NR              | NR  | NR | NR | NR  | NR | NR | NR | NR |
| Zhang, 2019                              | Early 2nd | Overweight/obese | NR  | NR  | NR    | No | NR | No | NR              | NR  | NR | NR | NR  | NR | NR | No | NR |
| Zhao, 2022                               | 1st       | All BMIs         | No  | Yes | NR    | NR | NR | NR | Mixed           | No  | NR | NR | NR  | NR | NR | NR | NR |

BMI: Body mass index, PCOS: polycystic ovary syndrome; GDM: Gestational diabetes; HDP: Hypertensive disorder during pregnancy; CVD: cardiovascular disease; NR: Not reported; Yes: With condition; No: Without condition;



**Supplementary Table 5: Risk of bias summary**

**Supplementary Table 5a: Risk of bias for RCTs**

| Author, Year                                     | Randomization process | Deviations from intended interventions | Missing outcome data | Measurement of the outcome | Selection of the reported result | Overall Bias  |
|--------------------------------------------------|-----------------------|----------------------------------------|----------------------|----------------------------|----------------------------------|---------------|
| <b>Intervention type: Physical activity-only</b> |                       |                                        |                      |                            |                                  |               |
| Barakat, 2013                                    | Low                   | Low                                    | Low                  | Low                        | Low                              | Some concerns |
| Barakat, 2014                                    | Some concerns         | High                                   | Low                  | Low                        | Low                              | High          |
| Barakat, 2019                                    | Low                   | Some concerns                          | Low                  | Low                        | Low                              | Some concerns |
| Basu, 2021                                       | Some concerns         | High                                   | Low                  | Low                        | Low                              | Some concerns |
| Cordero, 2015                                    | Some concerns         | Low                                    | Low                  | Low                        | Some concerns                    | Some concerns |
| DaSilva, 2017                                    | Low                   | High                                   | High                 | Low                        | Low                              | High          |
| Guelfi, 2016                                     | Low                   | Low                                    | Low                  | Low                        | Some concerns                    | Some concerns |
| Ko, 2012                                         | Some concerns         | Some concerns                          | Low                  | Low                        | Some concerns                    | Some concerns |
| Kong, 2014                                       | Low                   | Low                                    | Low                  | Some concerns              | Some concerns                    | Some concerns |
| Oostdam, 2012                                    | Low                   | High                                   | High                 | Low                        | Low                              | High          |
| Pelaez, 2019                                     | Some concerns         | Low                                    | Low                  | Low                        | Low                              | Some concerns |
| Price, 2011                                      | Low                   | Low                                    | High                 | Low                        | Low                              | High          |
| Ruiz, 2013                                       | Some concerns         | Low                                    | Low                  | Low                        | Low                              | Some concerns |
| Seneviratne, 2015                                | Low                   | Some concerns                          | Low                  | Low                        | Low                              | Some concerns |
| Stafne, 2012                                     | Low                   | Low                                    | Low                  | Low                        | Low                              | Low           |
| Wang, 2017                                       | Low                   | Some concerns                          | Low                  | Low                        | Low                              | Some concerns |
| <b>Intervention type: Diet-only</b>              |                       |                                        |                      |                            |                                  |               |
| Alamolhoda, 2019                                 | Some concerns         | Low                                    | Low                  | Low                        | Low                              | Some concerns |
| Alwattar, 2018                                   | Some concerns         | High                                   | Low                  | Low                        | Some concerns                    | High          |
| Assaf, 2017                                      | High                  | High                                   | High                 | Low                        | Low                              | High          |
| Bogaerts, 2013                                   | Low                   | Low                                    | Low                  | Low                        | Low                              | Low           |
| Jovanovic-Peterson, 1997                         | Some concerns         | Some concerns                          | Low                  | Low                        | Some concerns                    | Some concerns |
| Luoto, 2010                                      | Low                   | Low                                    | High                 | Some concerns              | Low                              | Some concerns |
| McCarthy, 2016                                   | Low                   | Low                                    | Low                  | Low                        | Low                              | Low           |
| Phillips, 2019                                   | Some concerns         | Low                                    | High                 | Low                        | Low                              | High          |
| Quinlivan, 2011                                  | Low                   | Low                                    | Low                  | Low                        | Some concerns                    | Some concerns |
| Sahariah, 2016                                   | Low                   | Low                                    | High                 | Low                        | Low                              | High          |
| Sun, 2020                                        | Low                   | Low                                    | Low                  | Some concerns              | High                             | High          |



|                                                                                     |               |               |               |               |               |               |
|-------------------------------------------------------------------------------------|---------------|---------------|---------------|---------------|---------------|---------------|
| Walsh, 2012                                                                         | Low           | Some concerns | Low           | Low           | Low           | Some concerns |
| Wolff, 2008                                                                         | Low           | Low           | Low           | Low           | Low           | Low           |
| Zhang, 2015                                                                         | High          | High          | High          | Some concerns | Some concerns | High          |
| <b>Intervention type: Combined (physical activity and diet).</b>                    |               |               |               |               |               |               |
| Abdel-Aziz, 2018                                                                    | Some concerns | Low           | Low           | Low           | Low           | Some concerns |
| Barakat, 2012                                                                       | Some concerns | High          | Low           | Low           | Low           | High          |
| Bruno, 2016                                                                         | Low           | Low           | Low           | Low           | Low           | Low           |
| Buckingham-Schutt 2019                                                              | Some concerns | High          | Low           | Low           | Low           | High          |
| Cahill, 2018                                                                        | High          | Low           | Low           | Low           | Low           | High          |
| Callaway, 2010                                                                      | Some concerns | High          | High          | Low           | Low           | High          |
| Chan R, 2018                                                                        | Low           | Low           | Low           | Low           | Low           | Low           |
| Deng, 2022                                                                          | High          | Low           | Low           | Low           | Low           | High          |
| Ding, 2021                                                                          | Low           | Low           | Low           | Some concerns | Low           | Some concerns |
| Dodd, 2019                                                                          | Low           | Low           | Low           | Low           | Low           | Low           |
| Eslami, 2018                                                                        | Some concerns | Some concerns | Low           | Some concerns | Low           | Some concerns |
| Gonzalez-Plaza, 2022                                                                | Low           | Some concerns | Low           | Low           | Some concerns | Some concerns |
| Harrison, 2013                                                                      | Low           | Low           | Low           | Low           | Some concerns | Some concerns |
| Herring, 2016                                                                       | Low           | Low           | Low           | Low           | Some concerns | Some concerns |
| Hui, 2006                                                                           | Some concerns | Some concerns | Low           | Low           | Some concerns | Some concerns |
| Hui, 2012                                                                           | Low           | Some concerns | Low           | Low           | Low           | Some concerns |
| Hui, 2014                                                                           | Low           | Some concerns | Low           | Low           | Low           | Some concerns |
| Janumala, 2020                                                                      | Some concerns | High          | Low           | Low           | Some concerns | High          |
| Jing, 2015                                                                          | Low           | Some concerns | Low           | Low           | Low           | Some concerns |
| Kennelly, 2018                                                                      | Low           | Some concerns | Low           | Low           | Low           | Some concerns |
| Huvinen 2018,Rono 2018, Koivusalo 2016, Huvinen 2022, Valkama 2018, Grotenfelt 2019 | Low           | Some concerns | Low           | Low           | Some concerns | Some concerns |
| Korpi-Hyovalti, 2011                                                                | Low           | Some concerns | Low           | Low           | Some concerns | Some concerns |
| LeBlanc, 2020                                                                       | Low           | Some concerns | Low           | Low           | Some concerns | Some concerns |
| Li, 2021                                                                            | Low           | Some concerns | Low           | Low           | Some concerns | Some concerns |
| Lin, 2020                                                                           | Low           | Some concerns | Low           | Low           | Some concerns | Some concerns |
| Liu, 2015                                                                           | Low           | Some concerns | Some concerns | Low           | Low           | Some concerns |

|                                                |               |               |      |      |               |               |
|------------------------------------------------|---------------|---------------|------|------|---------------|---------------|
| Liu, 2021                                      | Low           | Some concerns | Low  | High | Some concerns | High          |
| Mohsenzadeh-ledari F, 2020                     | Some concerns | Low           | Low  | Low  | Some concerns | Low           |
| Motahari-Tabari N, 2021                        | Low           | Some concerns | Low  | Low  | Low           | Some concerns |
| Parat, 2019                                    | Low           | High          | Low  | Low  | Low           | High          |
| Peccei, 2017                                   | Some concerns | High          | Low  | Low  | Low           | High          |
| Petrella, 2014                                 | Some concerns | High          | Low  | Low  | Low           | High          |
| Phelan, 2011                                   | Low           | Some concerns | Low  | Low  | Low           | Some concerns |
| Phelan, 2018                                   | Some concerns | Some concerns | Low  | Low  | Low           | Some concerns |
| Polley, 2002                                   | Some concerns | High          | High | Low  | Low           | High          |
| Poston 2015, Mills, 2019, Peacock, 2020        | Some concerns | Low           | High | Low  | Low           | High          |
| Renault, 2014                                  | Low           | High          | High | High | Low           | High          |
| Sagedal, 2017                                  | Low           | Low           | Low  | Low  | Low           | Low           |
| Simmons, 2017                                  | Low           | Low           | Low  | Low  | Low           | Low           |
| Thornton, 2009                                 | Low           | Low           | Low  | Low  | Some concerns | Some concerns |
| Trak-Fellermeier, 2019, Haslam, 2020           | Low           | Low           | Low  | Low  | High          | Some concerns |
| Van Horn, 2018                                 | Low           | Low           | Low  | Low  | Some concerns | Some concerns |
| Vesco, 2014                                    | Low           | Some concerns | Low  | Low  | Low           | Low           |
| Vinter, 2011, Vinter, 2014                     | Low           | Low           | Low  | Low  | Low           | Low           |
| Xu, 2022                                       | Low           | High          | Low  | Low  | Low           | Some concerns |
| Zhang, 2019                                    | Low           | Low           | Low  | Low  | Low           | Low           |
| Zhao, 2022                                     | Low           | Low           | Low  | Low  | Low           | Low           |
| <b>Intervention type: Myoinositol/inositol</b> |               |               |      |      |               |               |
| D'Anna, 2015                                   | Some concerns | Some concerns | Low  | Low  | Low           | Some concerns |
| D'Anna, 2013                                   | Low           | Low           | Low  | Low  | Low           | Low           |
| Matarrelli, 2013                               | Low           | Low           | Low  | Low  | Low           | Low           |
| Santamaria, 2015                               | Some concerns | High          | High | Low  | Low           | High          |
| Vitale, 2021                                   | Low           | High          | Low  | Low  | Low           | High          |
| Celentano, 2020                                | Some concerns | Low           | Low  | Low  | Low           | Some concerns |
| Farren, 2017                                   | Low           | High          | Low  | Low  | Low           | High          |
| <b>Intervention type: probiotics</b>           |               |               |      |      |               |               |
| Callaway, 2019                                 | Low           | Low           | Low  | Low  | Low           | Low           |
| Lindsay, 2014                                  | Some concerns | High          | Low  | Low  | Low           | High          |
| Wickens, 2017                                  | Low           | Low           | Low  | Low  | Low           | Low           |
| Luoto, 2021                                    | Low           | Low           | Low  | Low  | High          | High          |

|                                     |               |               |     |     |               |               |
|-------------------------------------|---------------|---------------|-----|-----|---------------|---------------|
| Pellonpera, 2019                    | High          | Low           | Low | Low | Low           | High          |
| <b>Intervention type: metformin</b> |               |               |     |     |               |               |
| Chiswick, 2008                      | Low           | Low           | Low | Low | Low           | Low           |
| Dodd, 2018                          | Low           | Low           | Low | Low | Low           | Low           |
| Jamal, 2012                         | Low           | Some concerns | Low | Low | Low           | Some concerns |
| Sales, 2018                         | Some concerns | High          | Low | Low | Low           | High          |
| Syngelaki, 2016                     | Low           | Low           | Low | Low | Low           | Low           |
| Valdés 2018                         | Low           | High          | Low | Low | High          | High          |
| Vanky 2010                          | Low           | Low           | Low | Low | Some concerns | Some concerns |

**Supplementary Table 5b: Risk of bias for cluster-RCTs**

| Author, Year                                                    | Randomization process | Identification of recruitment of participants | Deviations from intended interventions | Missing outcome data | Measurement of the outcome | Selection of the reported result | Overall Bias  |
|-----------------------------------------------------------------|-----------------------|-----------------------------------------------|----------------------------------------|----------------------|----------------------------|----------------------------------|---------------|
| <b>Intervention type: Combined (diet and physical activity)</b> |                       |                                               |                                        |                      |                            |                                  |               |
| Garmendia, 2020                                                 | High                  | Low                                           | Some concerns                          | Low                  | Low                        | Low                              | High          |
| Hajian, 2020                                                    | Some concerns         | Low                                           | Low                                    | Low                  | Low                        | Some concerns                    | Some concerns |
| Kunath, 2019, Gunther, 2022, Hoffman, 2021                      | Low                   | Low                                           | Low                                    | Low                  | Some concerns              | Some concerns                    | Some concerns |
| Luoto, 2011                                                     | Low                   | High risk                                     | Low risk                               | Low                  | Low risk                   | Low risk                         | High          |
| Rauh, 2013                                                      | High                  | Low                                           | Low                                    | Low                  | Low                        | Low                              | High          |
| Wang, 2015                                                      | Low                   | Some concerns                                 | Low                                    | Low                  | Low                        | Low                              | Some concerns |
| <b>Intervention type: Metformin</b>                             |                       |                                               |                                        |                      |                            |                                  |               |
| Lovvik, 2019                                                    | Low                   | Low                                           | High                                   | Low                  | Low                        | Some concerns                    | Some concerns |

**Supplementary Table 5c: Risk of bias for non-RCTs.**

| Author, Year                                                    | Confounding | Selection of participants | Classification of interventions | Deviations from intended interventions | Missing data | Measurement of outcomes | Selection of the reported result | Overall Bias |
|-----------------------------------------------------------------|-------------|---------------------------|---------------------------------|----------------------------------------|--------------|-------------------------|----------------------------------|--------------|
| <b>Intervention type: Diet-only</b>                             |             |                           |                                 |                                        |              |                         |                                  |              |
| Opie, 2016                                                      | Critical    | Low                       | Low                             | Critical                               | Low          | Moderate                | Low                              | Critical     |
| Gregory, 2016                                                   | Moderate    | Low                       | Moderate                        | NI                                     | Low          | Low                     | Low                              | Moderate     |
| <b>Intervention type: Combined (Diet and physical activity)</b> |             |                           |                                 |                                        |              |                         |                                  |              |
| Epel, 2019                                                      | Critical    | Low                       | Low                             | Critical                               | Low          | Low                     | Low                              | Critical     |
| Gray-Donald, 2000                                               | Serious     | Low                       | Low                             | NI                                     | Low          | Low                     | Low                              | Serious      |
| Liu, 2015                                                       | Moderate    | Low                       | Low                             | Moderate                               | Low          | Moderate                | Low                              | Serious      |
| Shirazian, 2010                                                 | Low         | Low                       | Low                             | Low                                    | Moderate     | Low                     | Low                              | Moderate     |
| Shirazian, 2014                                                 | Low         | Low                       | Low                             | Serious                                | Low          | Low                     | Low                              | Serious      |
| Sun, 2016                                                       | Low         | Low                       | Low                             | NI                                     | Low          | Low                     | Low                              | Low          |
| <b>Intervention type: Metformin</b>                             |             |                           |                                 |                                        |              |                         |                                  |              |
| Abd El Hameed, 2011                                             | Low         | Low                       | Low                             | Moderate                               | Serious      | Moderate                | Low                              | Moderate     |
| Ainuddin, 2015                                                  | Serious     | Moderate                  | Low                             | NI                                     | Low          | Low                     | Moderate                         | Serious      |
| Glueck, 2002a                                                   | Critical    | Low                       | Low                             | Critical                               | Critical     | Moderate                | Low                              | Critical     |

|                                                  |          |     |          |     |          |          |          |          |
|--------------------------------------------------|----------|-----|----------|-----|----------|----------|----------|----------|
| Glueck, 2002                                     | Serious  | Low | Low      | NI  | Low      | Low      | Moderate | Serious  |
| Khattab, 2011                                    | Serious  | Low | Serious  | NI  | NI       | Low      | Moderate | Serious  |
| <b>Intervention type: physical activity-only</b> |          |     |          |     |          |          |          |          |
| Tomic, 2013                                      | Critical | Low | Moderate | Low | Moderate | Moderate | Low      | Critical |

**Note:** NI=No information; the order of severity of bias is Low<Moderate<Serious<Critical

**Supplementary Table 5d: Summary of risk of bias assessment for RCTs**

|                            | Randomization process | Deviations from intended interventions | Missing outcome data | Measurement of the outcome | Selection of the reported result | Overall Bias     |
|----------------------------|-----------------------|----------------------------------------|----------------------|----------------------------|----------------------------------|------------------|
| <b>Risk classification</b> | Low=63                | Low=47                                 | Low=82               | Low=88                     | Low=69                           | Low=21           |
|                            | Some concerns=28      | Some concerns=26                       | Some concerns=1      | Some concerns=6            | Some concerns=23                 | Some concerns=44 |
|                            | High=5                | High=23                                | High=13              | High=2                     | High=4                           | High=30          |

**Supplementary Table 5e: Summary of risk of bias assessment for cluster RCTs**

|                            | Randomization process | Identification of recruitment of participants | Deviations from intended interventions | Missing outcome data | Measurement of the outcome | Selection of the reported result | Overall Bias    |
|----------------------------|-----------------------|-----------------------------------------------|----------------------------------------|----------------------|----------------------------|----------------------------------|-----------------|
| <b>Risk classification</b> | Low=4                 | Low=5                                         | Low=5                                  | Low=7                | Low=6                      | Low=4                            | Low=0           |
|                            | Some concerns=1       | Some concerns=1                               | Some concerns=1                        | Some concerns=0      | Some concerns=1            | Some concerns=3                  | Some concerns=4 |
|                            | High=2                | High=1                                        | High=1                                 | High=0               | High=0                     | High=0                           | High=3          |

**Supplementary Table 5g: Summary of risk of bias assessment for non-RCTs**

|                            | Confounding      | Selection of participants | Classification of interventions | Deviations from intended interventions | Missing data     | Measurement of outcomes | Selection of the reported result | Overall Bias     |
|----------------------------|------------------|---------------------------|---------------------------------|----------------------------------------|------------------|-------------------------|----------------------------------|------------------|
| <b>Risk classification</b> | Low=4            | Low=13                    | Low=11                          | Low=2                                  | Low=9            | Low=9                   | Low=11                           | Low=1            |
|                            | Moderate=2       | Moderate=1                | Moderate=2                      | Moderate=2                             | Moderate=2       | Moderate=5              | Moderate=3                       | Moderate=3       |
|                            | Critical=4       | Critical=0                | Critical=0                      | Critical=3                             | Critical=1       | Critical=0              | Critical=0                       | Critical=4       |
|                            | Serious=4        | Serious=0                 | Serious=1                       | Serious=1                              | Serious=1        | Serious=0               | Serious=0                        | Serious=6        |
|                            | No information=0 | No information=0          | No information=0                | No information=1                       | No information=1 | No information=0        | No information=0                 | No information=0 |

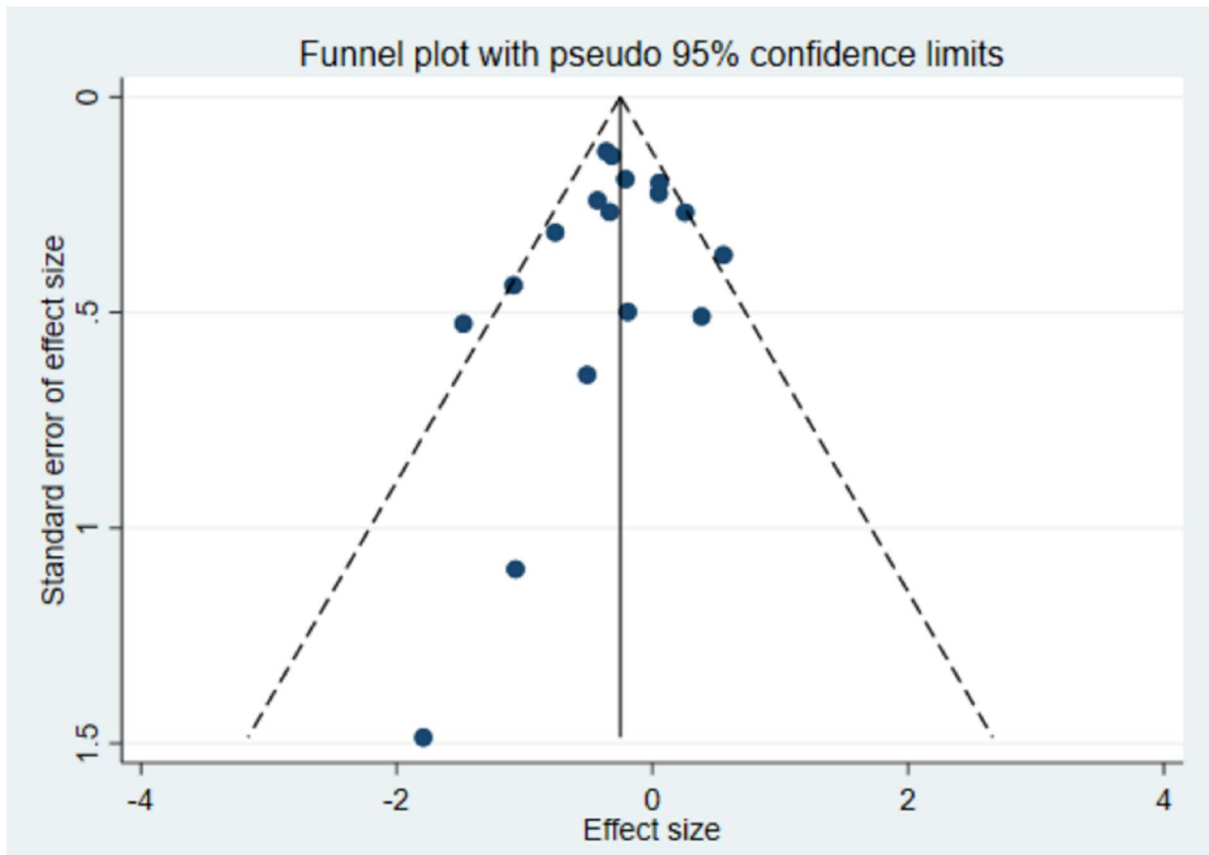

Supplementary Figure 1: A funnel plot showing the publication bias of studies on metformin intervention for preventing GDM.

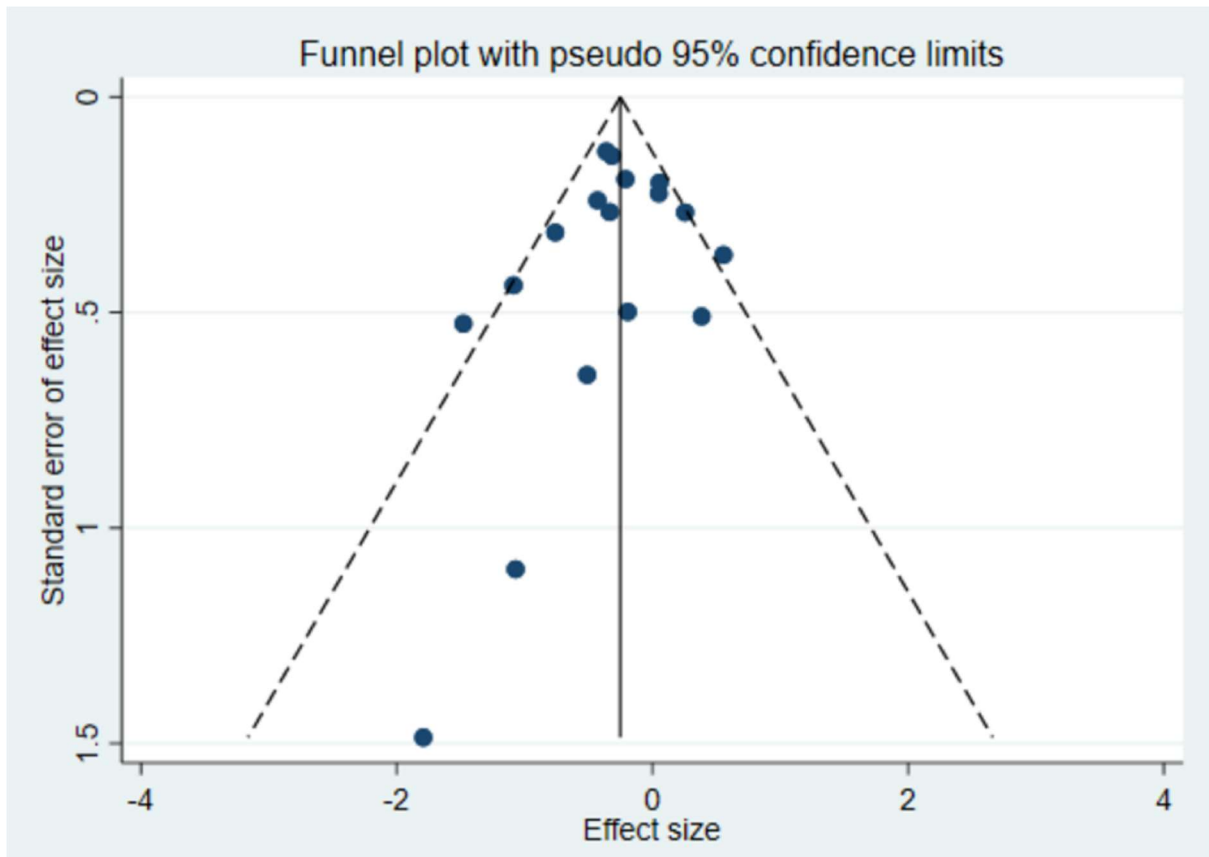

Supplementary Figure 2: A funnel plot showing the publication bias of studies on dietary interventions for preventing GDM.



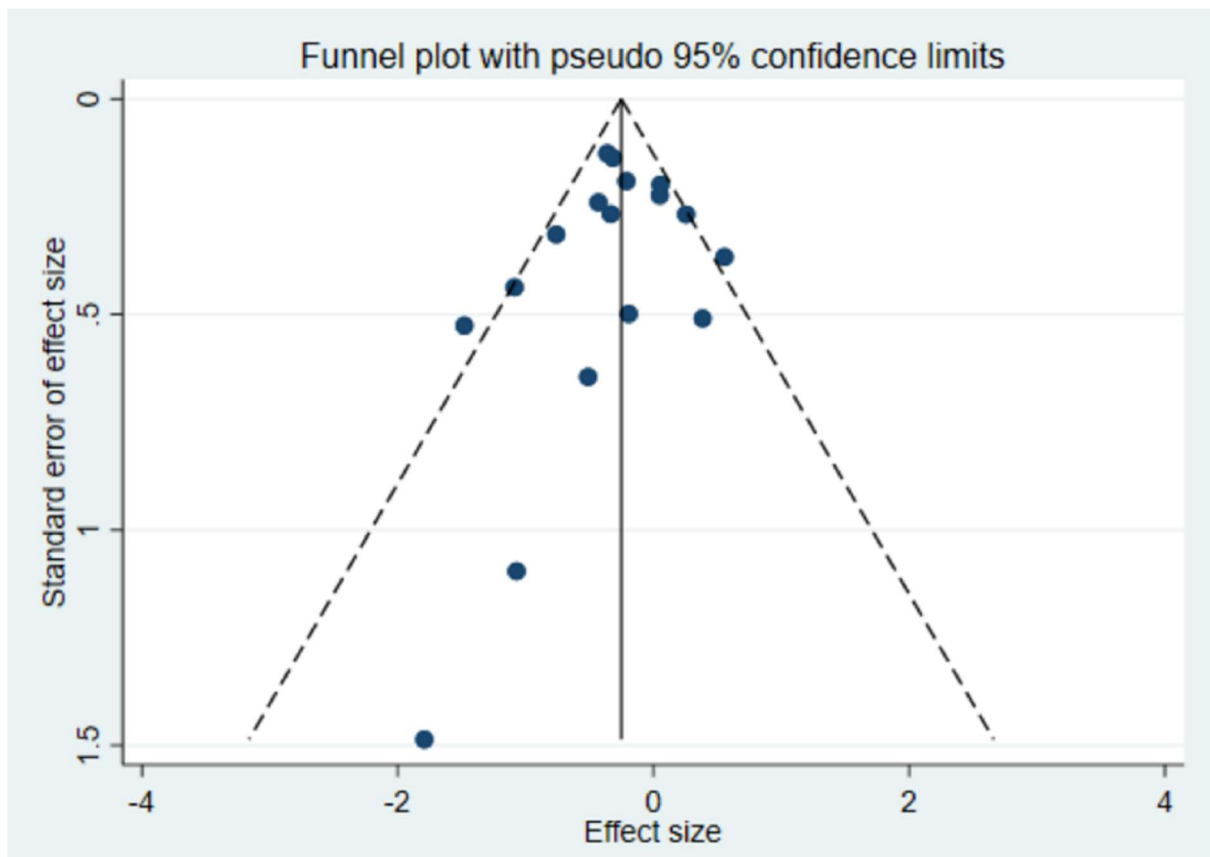

Supplementary Figure 3: A funnel plot showing the publication bias of studies on physical activity interventions for preventing GDM.

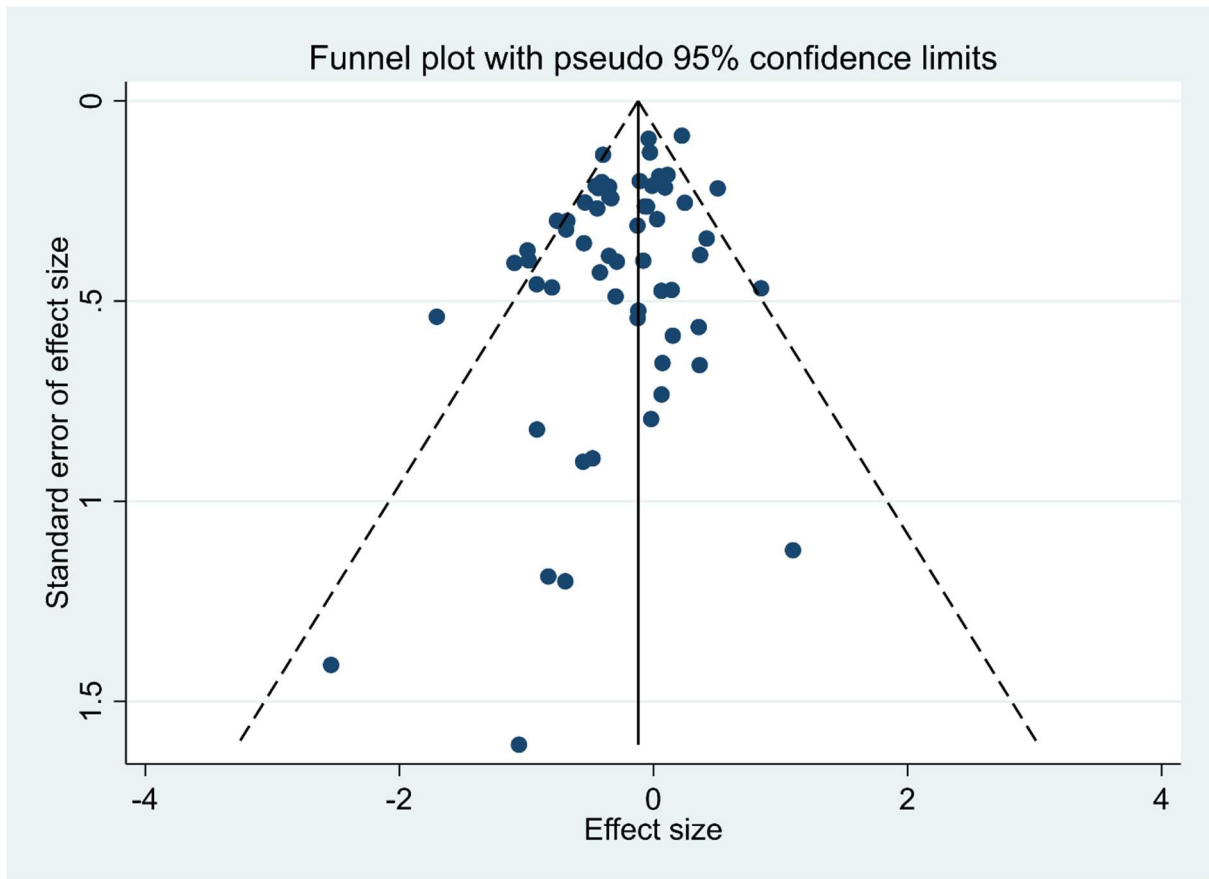

Supplementary Figure 4: A funnel plot showing the publication bias of studies on combined dietary and physical activity interventions for preventing GDM.

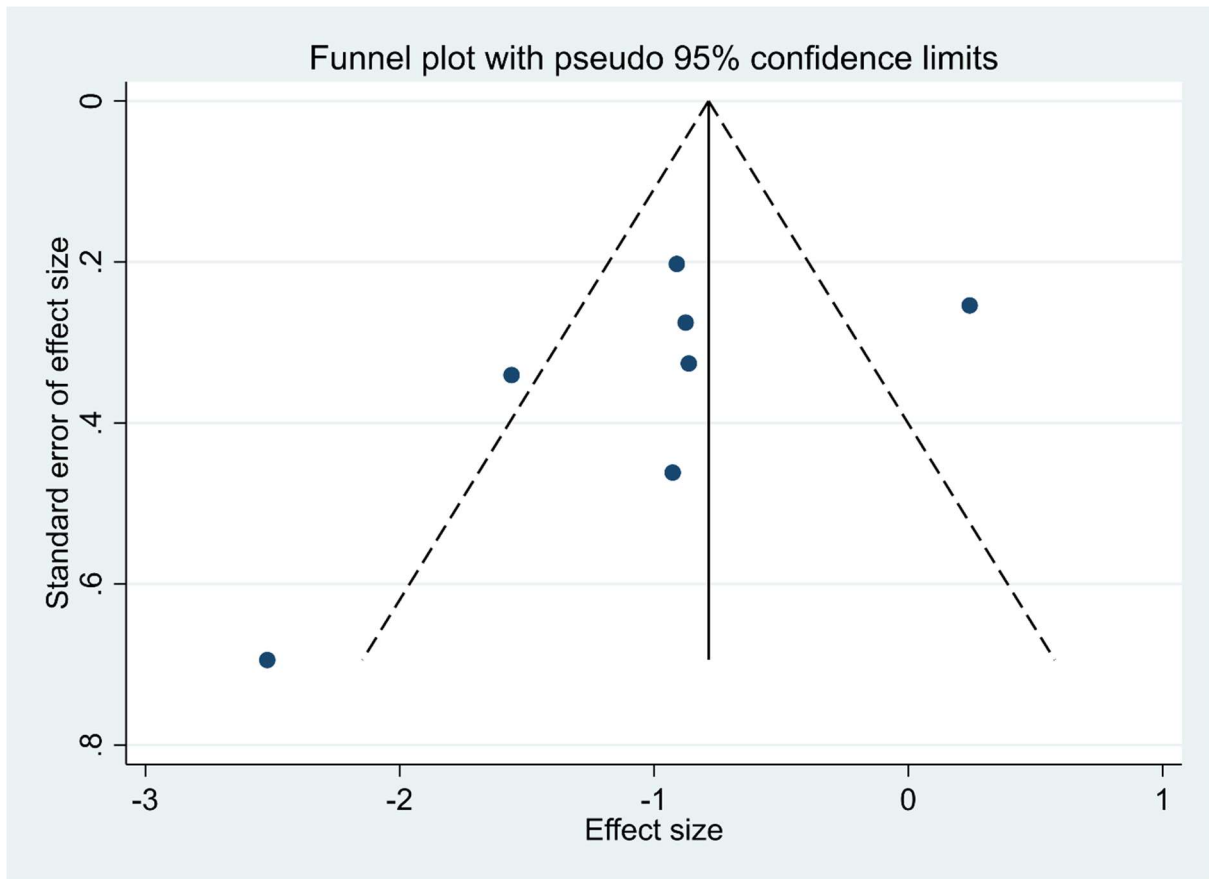

Supplementary Figure 5: A funnel plot showing the publication bias of studies on myoinositol/inositol intervention for preventing GDM.

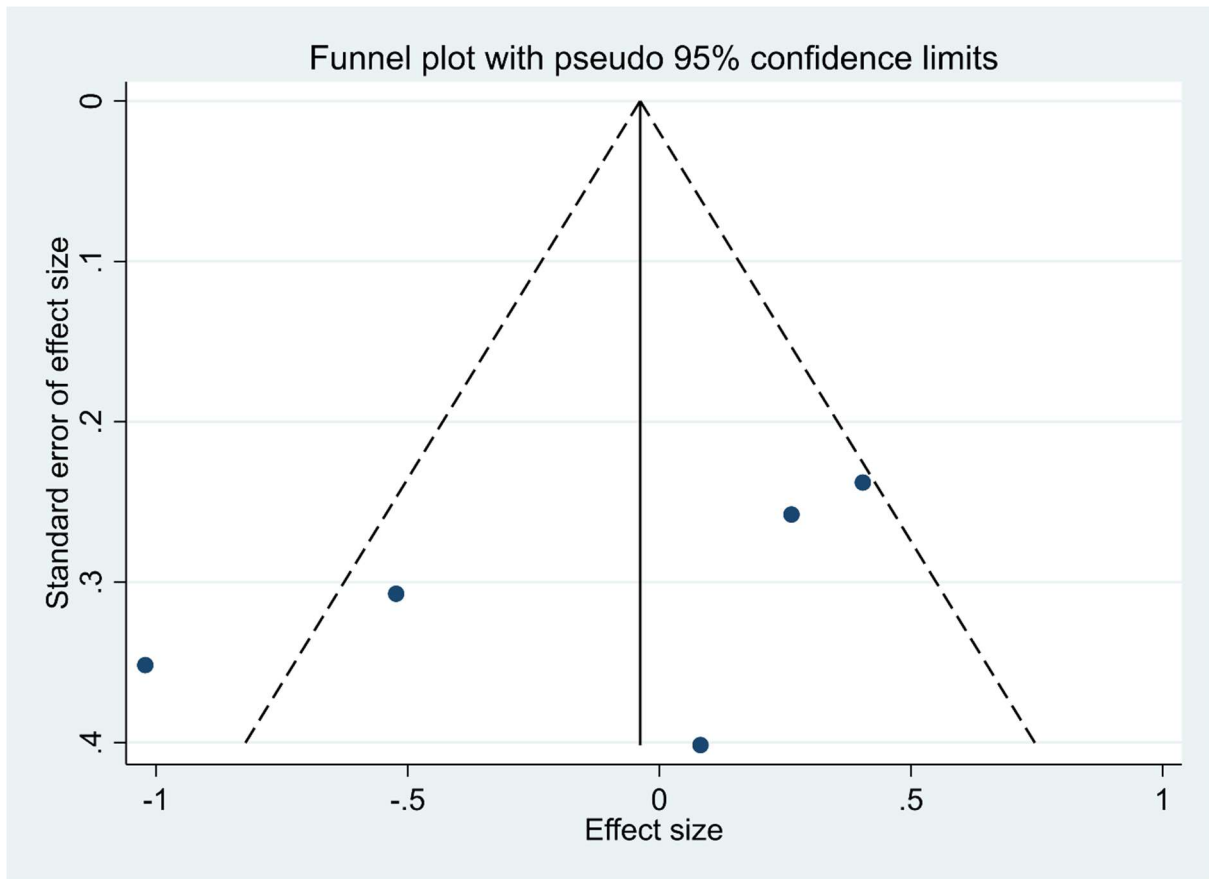

Supplementary Figure 6: A funnel plot showing the publication bias of studies on probiotics intervention for preventing GDM.
